# Supplementary material for: Ultrafast variation of the polarized state in proton-π electron coupled ferroelectric cocrystal Phz-H2ca
Source: Royal Society of Chemistry journal article supplement (doi:10.1039/d3ma00317e), 2023-01-01
Supplement: d3ma00317e1.pdf [file d3ma00317e1.pdf]

**Electronic supplementary information**  
**Ultrafast Variation of Polarized State in Proton- $\pi$  Electron Coupled**  
**Ferroelectric Cocrystal Phz-H<sub>2</sub>ca**

Akihiro Sugisawa, Tsugumi Umanodan, Hongwu Yu, Tadahiko Ishikawa, Shin-ya Koshihara,  
Sachio Horiuchi, and Yoichi Okimoto

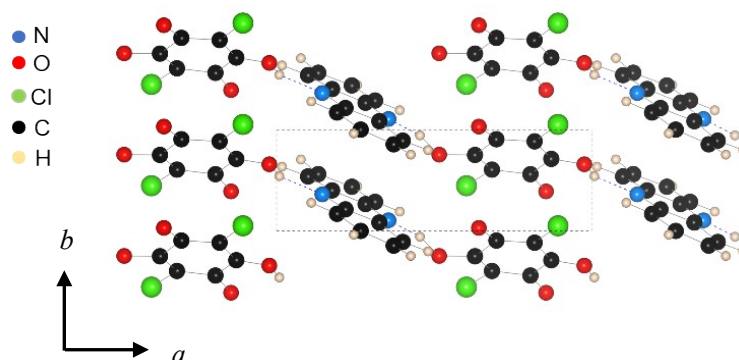

**Figure S1** Molecular structures for Phz and H<sub>2</sub>ca and crystal arrangement viewed along the *c*-axis in the ferroelectric phase.<sup>1</sup>

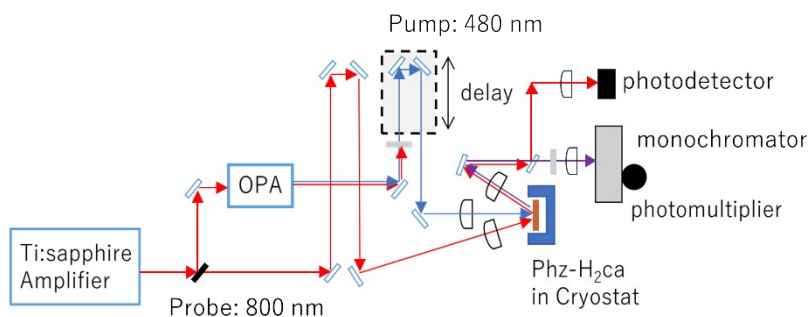

**Figure S2** Schematic of experimental setup for the relative reflectance change ( $\Delta R/R$ ) and relative SHG intensity change ( $\Delta I_{SH}/I_{SH}$ ) measurements

**References**

[S1] R. Kumai, S. Horiuchi, H. Sagayama, T. Arima, M. Watanabe, Y. Noda and Y. Tokura, *J. Am. Chem. Soc.*, 2007, **129**, 12920-12921.
